# Supplementary material
Source: bioRxiv or medRxiv preprint supplement (https://www.biorxiv.org/highwire/filestream/132377/field_highwire_adjunct_files/0/440230-1.pdf)
Supplement: Supplementary file [file 440230-1.pdf]

Supplemental Figures

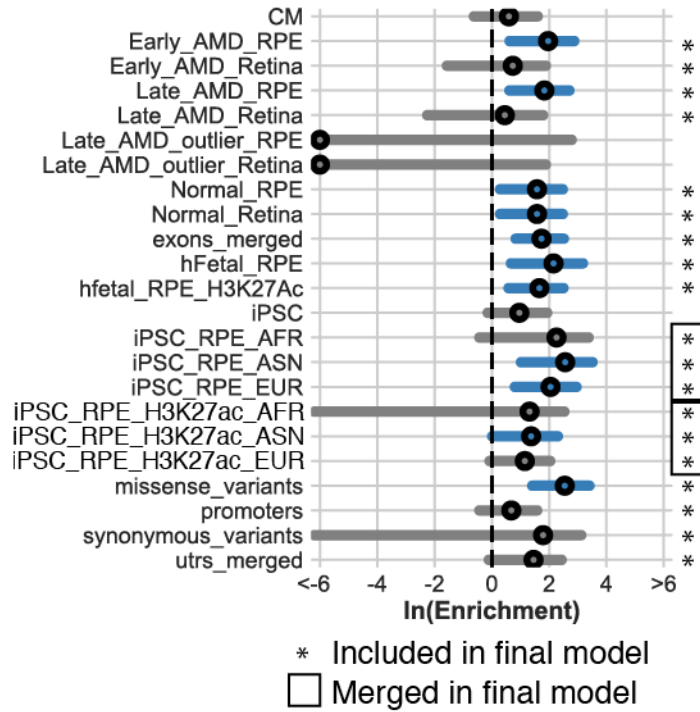

**Figure S1.** Single fgwas enrichments for annotations including negative controls (iPSC and CM), Late AMD outlier samples, and iPSC-RPE ATAC and H3H27Ac split by ancestry. Asterisks indicate whether the annotation was included in the final model and rectangles around asterisks indicate whether the annotations were merged before being included in the final model. Related to Figure 3.
